# Supplementary material for: Microbial Indoles: Key Regulators of Organ Growth and Metabolic Function
Source: MDPI journal article supplement (doi:10.3390/microorganisms12040719), 2024-04-02
Supplement: s1 [file s1]

## SUPPLEMENTAL INFORMATION

FIGURE S1

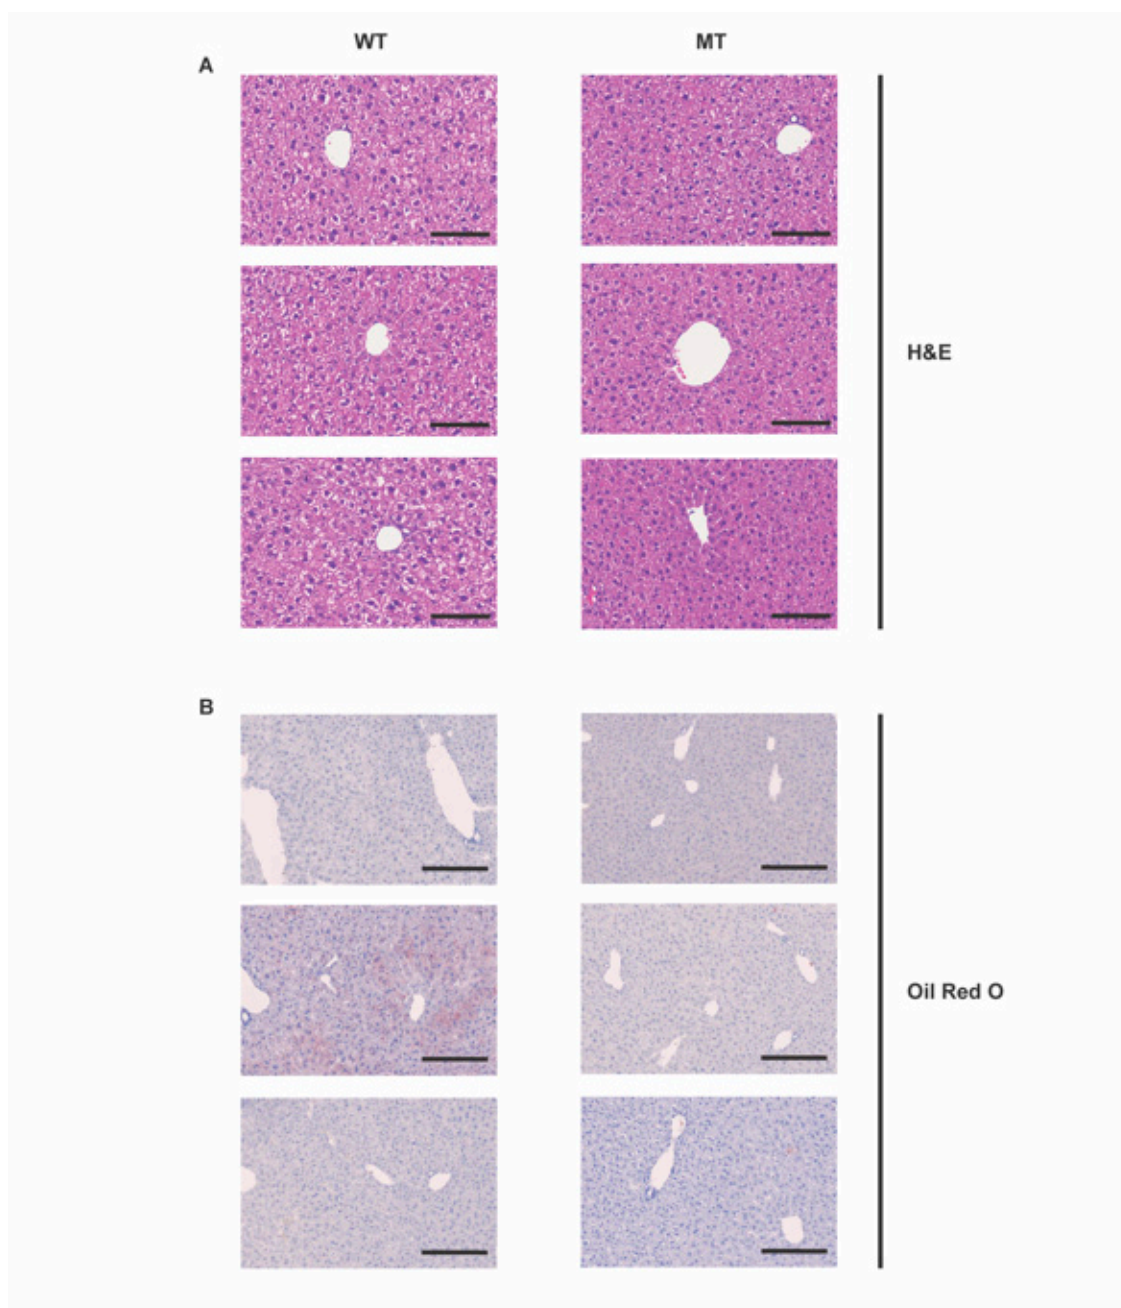

**Figure S1.** Representative images of liver histological analyses by (A) haematoxylin and eosin (H&E) and (B) oil red O staining. For A, scale bars = 100  $\mu\text{m}$ ; For B, scale bars = 200  $\mu\text{m}$

FIGURE S2

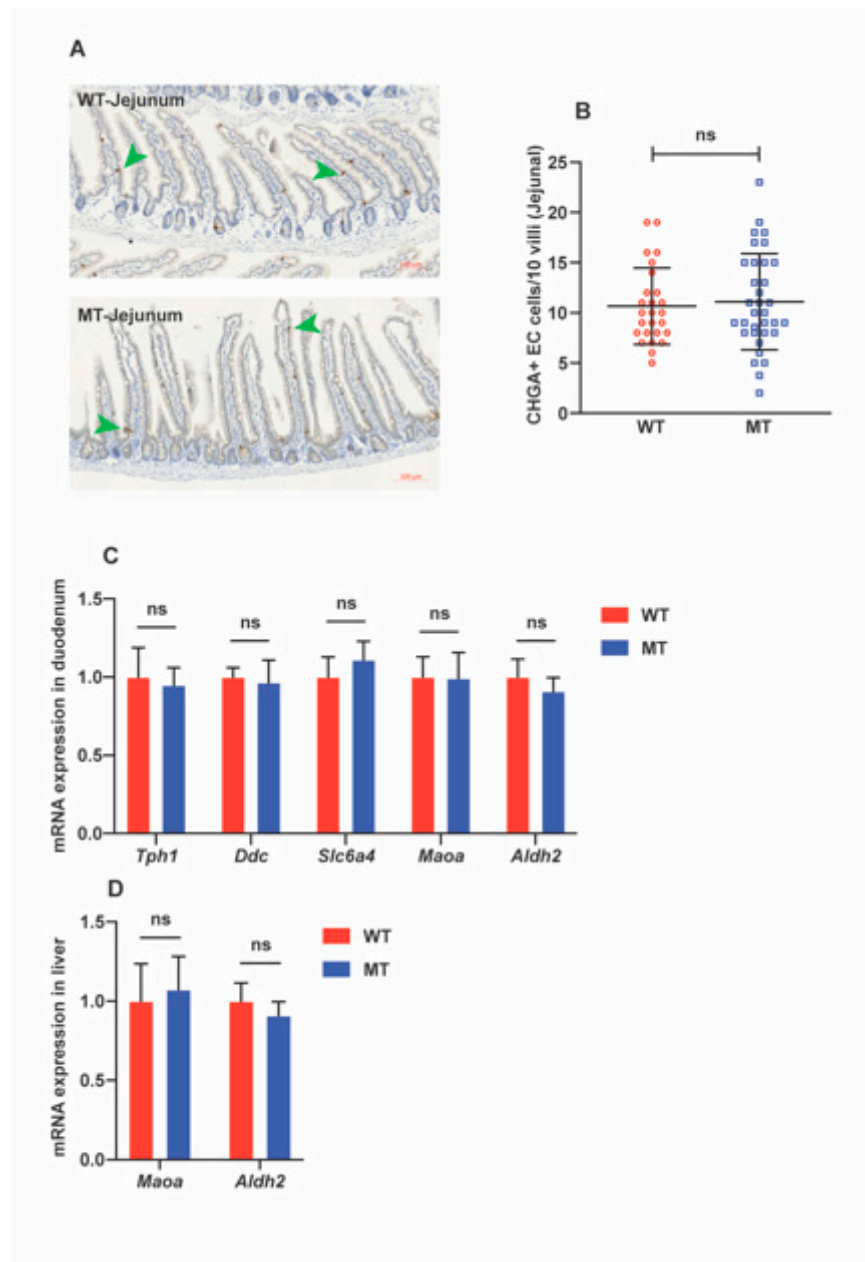

**Figure S2. Jejunal serotonin-producing enterochromaffin cell numbers and serotonin metabolism in SI and liver in WT and MT mice.** (A) Representative images of jejunal tissue sections stained with anti-chromogranin A (CHGA) antibody for enterochromaffin cells (in brown, indicated by green arrow heads), in jejunum of WT and MT mice, with haematoxylin-counterstained nuclei (in blue). Scale bar = 100  $\mu$ m. (B) Quantification of CHGA<sup>+</sup> enterochromaffin cells (number of cells per 10 villi) in jejunum of WT and MT mice (n=6 per group). (C) mRNA expression of enzymes for serotonin synthesis *Tph1* (tryptophan hydroxylase 1) and *Ddc* (5-hydroxytryptophan decarboxylase), serotonin transporter *Slc6a4*, and enzymes for serotonin metabolism *Maoa* and *Aldh2*, in the duodenum of WT and MT mice

(n=8 per group). **(D)** mRNA expression of enzymes for serotonin metabolism *Maoa* and *Aldh2* in the livers of WT and MT mice (n=8 per group). mRNA levels were normalized to the control gene *Hprt1*. Data graphs show means  $\pm$  S.D. *p* values were calculated with the student's *t* test. ns denotes not significant with  $p \geq 0.05$  between indicated groups.

FIGURE S3

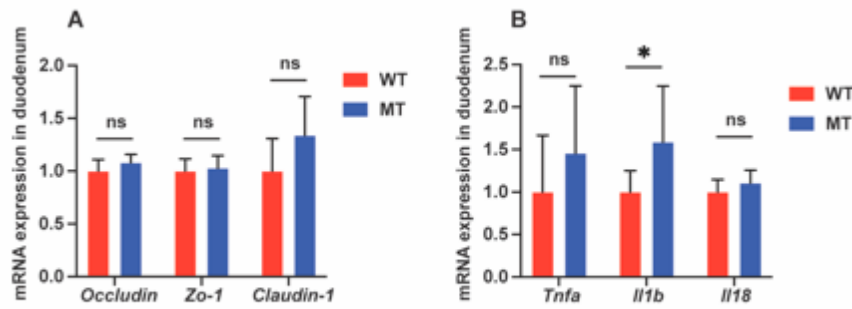

**Figure S3.** qPCR analyses on **(A)** intestinal tight junction proteins, *Occludin*, *Zo-1* (zonula occludens-1), and *Claudin-1* (n=8 per group); and **(B)** pro-inflammatory cytokines *Tnfa* (tumour necrosis factor alpha), *Il1b* (interleukin 1 beta), *Il18* (interleukin 18), in the duodena of WT and MT mice (n=7-8 per group). mRNA levels were normalized to the control gene *Hprt1*. Data graphs show means  $\pm$  S.D. *p* values were calculated with the student's *t* test. Statistical significance is presented as  $*p < 0.05$  between indicated groups. ns denotes not significant with  $p \geq 0.05$ .

FIGURE S4

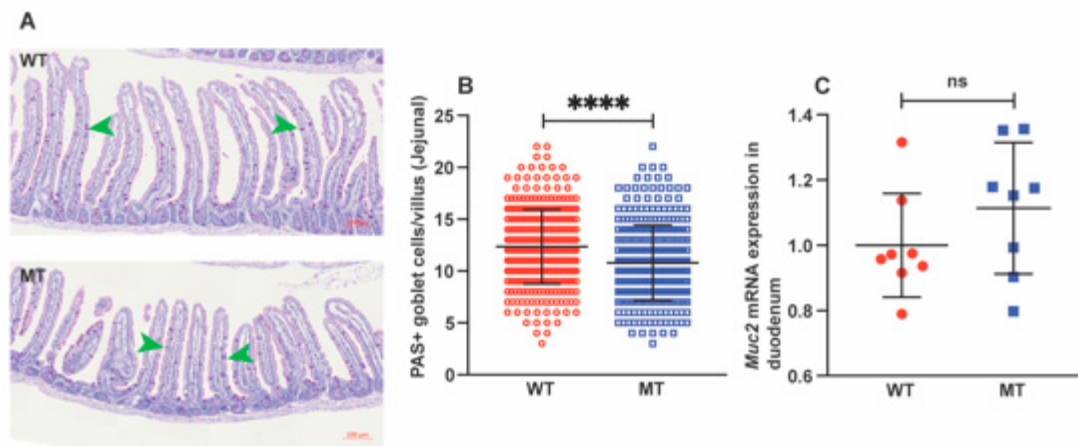

**Figure S4. Indole-non-producing *E. coli*-colonized mice contained fewer mucus-producing goblet cells in the small intestines.** (A) Representative images of jejunal tissue sections stained with periodic acid-Schiff (PAS) reagent for goblet cells (in deep purple, green arrow heads indicate representative cells), in jejunum of WT and MT mice, with haematoxylin-counterstained nuclei (in blue). Scale bar, 100  $\mu$ m. (B) Quantification of goblet cells (number of PAS<sup>+</sup> cells per villus) in jejunum of WT and MT mice (n=6 per group). (C) mRNA expression of mucin 2 (*Muc2*) in the duodena of WT and MT mice (n=8 per group). mRNA levels were normalized to the control gene *Hprt1*. Data graphs show means  $\pm$  S.D. *p* values were calculated with the student's *t* test. Statistical significance is presented as \*\*\*\**p* < 0.0001 between indicated groups. ns denotes not significant with *p*  $\geq$  0.05.

FIGURE S5

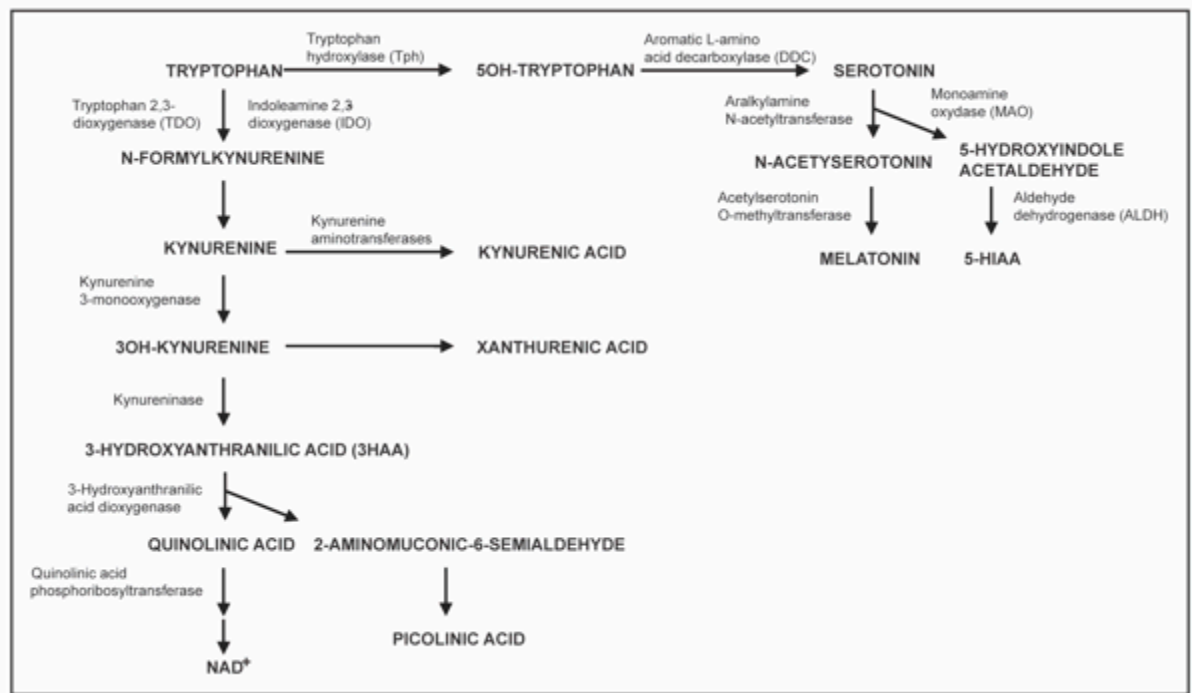

**Figure S5. Illustration of tryptophan metabolisms in the mammalian host.** Tryptophan can be metabolized in the host via the kynurenine pathway, through which kynurenine and NAD<sup>+</sup>, along with other metabolites, are produced. Alternatively, tryptophan can also be metabolized in the intestines by the enterochromaffin cells, or in the brain, through the serotonin pathway, leading to the production of serotonin. Serotonin can be further metabolized to 5-hydroxyindoleacetic acid (5-HIAA) or be utilized as a substrate for production of melatonin, a hormone regulating the sleep-wake cycle. NAD<sup>+</sup>, nicotinamide adenine dinucleotide (oxidized). Figure is adapted from Schwarcz & Stone, 2017<sup>41</sup>. Copyright © 2016 Elsevier Ltd. Adapted with permission.

**Table S1.** mRNA expression levels of selected genes in liver samples from WT and MT mice. n=7-8 per group. *p* values were calculated with the student's *t* test. Statistical significance is presented as \**p* < 0.05, \*\**p* < 0.01, \*\*\**p* < 0.001, and \*\*\*\**p* < 0.0001 between indicated groups. ns denotes no statistical significance with *p* ≥ 0.05.

| Functions                    | Genes         | Gene products                                                                                                                       | Expression in MT mice compared with WT mice | Statistical significance | <i>p</i> values |
|------------------------------|---------------|-------------------------------------------------------------------------------------------------------------------------------------|---------------------------------------------|--------------------------|-----------------|
| Metabolism regulators        | <i>Pgc1a</i>  | Peroxisome proliferator-activated receptor gamma coactivator 1-alpha, a regulator of energy metabolism and mitochondrial biogenesis | -                                           | ns                       | 0.1093          |
|                              | <i>Sirt1</i>  | Sirtuin 1, a regulator of hepatic gluconeogenesis, fatty acid oxidation and cholesterol degradation                                 | ↑                                           | **                       | 0.0015          |
| Glucose metabolism regulator | <i>Hnf4a</i>  | Hepatocyte nuclear factor 4 alpha                                                                                                   | ↓                                           | ns                       | 0.1068          |
| TCA cycle enzymes            | <i>Pc</i>     | Pyruvate carboxylase, converting pyruvate to oxaloacetate                                                                           | ↓                                           | **                       | 0.0046          |
|                              | <i>Cs</i>     | Citrate synthase, converting oxaloacetate to citrate                                                                                | ↓                                           | ****                     | <0.0001         |
|                              | <i>Aco2</i>   | Aconitase, converting citrate to <i>cis</i> -Aconitate                                                                              | ↓                                           | *                        | 0.0251          |
| Lipogenesis enzymes          | <i>Acly</i>   | ATP citrate lyase, converting citrate to acetyl-CoA                                                                                 | ↓                                           | **                       | 0.0096          |
|                              | <i>Acaca</i>  | Acetyl-CoA carboxylase (alpha), converting acetyl-CoA to malonyl-CoA (the rate-limiting step in fatty acid synthesis)               | ↓                                           | *                        | 0.0229          |
|                              | <i>Acacb</i>  | Acetyl-CoA carboxylase (beta)                                                                                                       | ↓                                           | *                        | 0.0146          |
|                              | <i>Fasn</i>   | Fatty acid synthase                                                                                                                 | ↓                                           | *                        | 0.0167          |
|                              | <i>Hmgcs1</i> | Hydroxymethylglutaryl-CoA synthase, second step enzyme of cholesterol synthesis pathway                                             | ↓                                           | *                        | 0.0429          |
|                              | <i>Hmgcr</i>  | Hydroxymethylglutaryl-CoA reductase, rate-controlling enzyme of cholesterol synthesis pathway                                       | -                                           | ns                       | 0.2850          |
|                              | <i>Gyk</i>    | Glycerol kinase, an enzyme involved in lipogenesis                                                                                  | -                                           | ns                       | 0.5474          |
| Lipolysis enzymes            | <i>Acs11</i>  | long-chain fatty-acid-coenzyme A ligase                                                                                             | -                                           | ns                       | 0.3367          |
|                              | <i>Lipe</i>   | Hormone-sensitive lipase                                                                                                            | -                                           | ns                       | 0.1510          |
|                              | <i>Pnpla2</i> | Adipose triglyceride lipase                                                                                                         | -                                           | ns                       | 0.1439          |
| Lipid                        | <i>Ppara</i>  | Peroxisome proliferator-                                                                                                            | -                                           | ns                       | 0.2821          |

|                             |               |                                                                              |   |      |         |
|-----------------------------|---------------|------------------------------------------------------------------------------|---|------|---------|
| metabolism regulators       |               | activated receptor alpha, a major regulator of lipid metabolism in the liver |   |      |         |
|                             | <i>Fiaf</i>   | Angiopoietin-like 4, a serum hormone regulating lipid metabolism             | ↑ | **   | 0.0061  |
| Serotonin metabolic enzymes | <i>Maoa</i>   | Monoamine oxidase A, enzyme for first step of serotonin metabolism           | - | ns   | 0.5229  |
|                             | <i>Aldh2</i>  | Aldehyde dehydrogenase, enzyme for second step of serotonin metabolism       | ↓ | *    | 0.0240  |
| Inflammation                | <i>Il1b</i>   | Interleukin 1B, a proinflammatory cytokine                                   | - | ns   | 0.1731  |
|                             | <i>Il18</i>   | Interleukin 18, a proinflammatory cytokine                                   | - | ns   | 0.3366  |
| K <sup>+</sup> channel      | <i>Kcnj12</i> | Potassium Inwardly Rectifying Channel Subfamily J Member 12                  | ↓ | **** | <0.0001 |

**Table S2.** mRNA expression levels of selected genes in epididymal white adipose tissue (WAT) samples from WT and MT mice. n=6-8 per group. *p* values were calculated with the student's *t* test. Statistical significance is presented as \**p* < 0.05, \*\**p* < 0.01, \*\*\**p* < 0.001, and \*\*\*\**p* < 0.0001 between indicated groups. ns denotes no statistical significance with *p* ≥ 0.05.

| Functions                 | Genes         | Gene products                                                                                                | Expression in MT mice compared with WT mice | Statistical significance | <i>p</i> values |
|---------------------------|---------------|--------------------------------------------------------------------------------------------------------------|---------------------------------------------|--------------------------|-----------------|
| Metabolic regulators      | <i>Pgc1a</i>  | Peroxisome proliferator-activated receptor gamma coactivator 1-alpha                                         | -                                           | ns                       | 0.8131          |
|                           | <i>Pparg</i>  | Peroxisome proliferator-activated receptor gamma, a regulator of fat storage and glucose metabolism          | -                                           | ns                       | 0.4300          |
| Glucose transporter       | <i>Glut4</i>  | Glucose transporter type 4                                                                                   | ↑                                           | *                        | 0.0174          |
| Glyceroneogenesis enzymes | <i>Pck1</i>   | Phosphoenolpyruvate carboxykinase 1, cytosolic, an enzyme for glyceroneogenesis in adipose tissues           | ↑                                           | *                        | 0.0216          |
|                           | <i>Pck2</i>   | Phosphoenolpyruvate carboxykinase 2, mitochondrial, an enzyme for glyceroneogenesis in adipose tissues       | ↑                                           | **                       | 0.0027          |
| Lipolysis enzymes         | <i>Adrb2</i>  | Adrenergic receptor beta-2, regulating lipolysis                                                             | ↑                                           | *                        | 0.0323          |
|                           | <i>Adrb3</i>  | Adrenergic receptor beta-3, regulating lipolysis                                                             | ↑                                           | ns                       | 0.1982          |
|                           | <i>Acsl1</i>  | long-chain fatty-acid-coenzyme A ligase                                                                      | ↑                                           | **                       | 0.0341          |
|                           | <i>Lpl</i>    | Lipoprotein lipase                                                                                           | -                                           | ns                       | 0.6162          |
|                           | <i>Liipe</i>  | Hormone-sensitive lipase                                                                                     | -                                           | ns                       | 0.9809          |
|                           | <i>Pnpla2</i> | Adipose triglyceride lipase                                                                                  | -                                           | ns                       | 0.4106          |
|                           | <i>Pnpla3</i> | Adiponutrin, a triacylglycerol lipase                                                                        | -                                           | ns                       | 0.8219          |
|                           | <i>Fiaf</i>   | Angiopoietin-like 4, a serum hormone regulating lipid metabolism                                             | -                                           | ns                       | 0.4988          |
| Lipogenesis enzymes       | <i>Scd1</i>   | Stearoyl-CoA desaturase-1, catalysing the rate-limiting step in the formation of monounsaturated fatty acids | -                                           | ns                       | 0.9098          |
|                           | <i>Scd2</i>   | Stearoyl-CoA desaturase 2                                                                                    | ↓                                           | *                        | 0.0294          |
|                           | <i>Fasn</i>   | Fatty acid synthase                                                                                          | ↓                                           | ns                       | 0.9768          |
|                           | <i>Acaca</i>  | Acetyl-CoA carboxylase                                                                                       | -                                           | ns                       | 0.870           |



|                      |              |                                                                             |   |    |            |
|----------------------|--------------|-----------------------------------------------------------------------------|---|----|------------|
|                      |              | (alpha)                                                                     |   |    | 2          |
|                      | <i>Acacb</i> | Acetyl-CoA carboxylase (beta)                                               | - | ns | 0.532<br>2 |
| Fatty acid transport | <i>Cd36</i>  | Fatty acid translocase                                                      | - | ns | 0.069<br>7 |
|                      | <i>Fatp1</i> | Long-chain fatty acid transport protein 1                                   | ↑ | ** | 0.002<br>0 |
|                      | <i>Fatp4</i> | Long-chain fatty acid transport protein 4                                   | ↑ | ** | 0.007<br>0 |
| Heat production      | <i>Ucp1</i>  | Thermogenin                                                                 | - | ns | 0.084<br>8 |
|                      | <i>Ucp2</i>  | Mitochondrial uncoupling protein 2                                          | - | ns | 0.656<br>8 |
| Inflammation         | <i>Il1b</i>  | Interleukin 1 beta, a proinflammatory cytokine                              | - | ns | 0.157<br>4 |
|                      | <i>Il6</i>   | Interleukin 6, a pro-inflammatory cytokine and an anti-inflammatory myokine | ↓ | ** | 0.009<br>5 |
|                      | <i>Il18</i>  | Interleukin 18, a proinflammatory cytokine                                  | - | ns | 0.245<br>0 |
|                      | <i>Tnfa</i>  | Tumour necrosis factor, a cytokine for systemic inflammation                | - | ns | 0.487<br>6 |

**Table S3.** mRNA expression levels of selected genes in hindlimb muscles gastrocnemius (GS) samples from WT and MT mice. n=7-8 per group. *p* values were calculated with the student's *t* test. Statistical significance is presented as \**p* < 0.05, \*\**p* < 0.01, \*\*\**p* < 0.001, and \*\*\*\**p* < 0.0001 between indicated groups. ns denotes no statistical significance with *p* ≥ 0.05.

| Functions                                      | Genes            | Gene products                                                                                                                       | Expression in MT mice compared with WT mice | Statistical significance | <i>p</i> values |
|------------------------------------------------|------------------|-------------------------------------------------------------------------------------------------------------------------------------|---------------------------------------------|--------------------------|-----------------|
| Metabolism regulators                          | <i>Pgcl1a</i>    | Peroxisome proliferator-activated receptor gamma coactivator 1-alpha, a regulator of energy metabolism and mitochondrial biogenesis | -                                           | ns                       | 0.9843          |
|                                                | <i>Pparg</i>     | Peroxisome proliferator-activated receptor gamma, a regulator of fat storage and glucose metabolism                                 | -                                           | ns                       | 0.3779          |
| Glucose metabolism and mitochondrial functions | <i>Glut4</i>     | Glucose transporter                                                                                                                 | ↓                                           | *                        | 0.0285          |
|                                                | <i>Sdh</i>       | succinate dehydrogenase, a TCA cycle and respiratory chain enzyme                                                                   | ↓                                           | ns                       | 0.1879          |
|                                                | <i>Tfam</i>      | Mitochondrial transcription factor A                                                                                                | ↓                                           | *                        | 0.0456          |
|                                                | <i>Pdk4</i>      | Pyruvate dehydrogenase lipoamide kinase isozyme 4, mitochondrial, a regulator of glucose metabolism                                 | -                                           | ns                       | 0.6495          |
| Lipid metabolism                               | <i>Ppara</i>     | Peroxisome proliferator-activated receptor alpha, a major regulator of lipid metabolism in the liver                                | -                                           | ns                       | 0.6454          |
|                                                | <i>Fiaf</i>      | Angiopoietin-like 4, a serum hormone regulating lipid metabolism                                                                    | -                                           | ns                       | 0.9469          |
|                                                | <i>Srebp2</i>    | Sterol regulatory element-binding protein 2, a transcription factor regulating cholesterol homeostasis                              | ↓                                           | *                        | 0.0138          |
| Muscle components                              | <i>Myhc-1</i>    | Myosin heavy chain 1                                                                                                                | -                                           | ns                       | 0.5249          |
|                                                | <i>Myhc-2a</i>   | Myosin heavy chain 2a                                                                                                               | -                                           | ns                       | 0.5336          |
|                                                | <i>Myhc-2b</i>   | Myosin heavy chain 2b                                                                                                               | -                                           | ns                       | 0.4575          |
|                                                | <i>Myhc-2d</i>   | Myosin heavy chain 2d                                                                                                               | ↓                                           | *                        | 0.0182          |
|                                                | <i>Rapsyn</i>    | Receptor-associated protein of the synapse (neuromuscular junction-associated gene)                                                 | ↓                                           | ns                       | 0.2569          |
| Muscle atrophy                                 | <i>Murf-1</i>    | Muscle RING-finger protein-1, a muscle atrophy E3 ubiquitin ligase                                                                  | ↓                                           | *                        | 0.0215          |
|                                                | <i>Atrogin-1</i> | A muscle atrophy E3 ubiquitin ligase                                                                                                | ↓                                           | **                       | 0.0055          |

|                        |               |                                                                             |   |      |        |
|------------------------|---------------|-----------------------------------------------------------------------------|---|------|--------|
| Myogenesis             | <i>Myod</i>   | Myoblast determination protein 1, regulating muscle differentiation         | ↓ | n.s. | 0.1975 |
| Inflammation           | <i>Il6</i>    | Interleukin 6, a pro-inflammatory cytokine and an anti-inflammatory myokine | - | ns   | 0.4321 |
| K <sup>+</sup> channel | <i>Kcnj12</i> | Potassium Inwardly Rectifying Channel Subfamily J Member 12                 | - | ns   | 0.3598 |

**Table S4.** mRNA expression levels of selected genes in small intestine (SI) samples from WT and MT mice. n=7-8 per group. *p* values were calculated with the student's *t* test. Statistical significance is presented as \**p* < 0.05, \*\**p* < 0.01, \*\*\**p* < 0.001, and \*\*\*\**p* < 0.0001 between indicated groups. ns denotes no statistical significance with *p* ≥ 0.05.

| Functions                                                  | Genes            | Gene products                                                                                         | Expression in MT mice compared with WT mice | Statistical significance | <i>p</i> values |
|------------------------------------------------------------|------------------|-------------------------------------------------------------------------------------------------------|---------------------------------------------|--------------------------|-----------------|
| Gut barrier integrity                                      | <i>Occludin</i>  | Occludin, an epithelial cell tight junction protein                                                   | -                                           | ns                       | 0.1124          |
|                                                            | <i>Zo-1</i>      | Zonula occludens-1, an epithelial cell tight junction protein                                         | -                                           | ns                       | 0.6254          |
|                                                            | <i>Claudin-1</i> | Claudin-1, an epithelial cell tight junction protein                                                  | -                                           | ns                       | 0.0636          |
| Inflammation                                               | <i>Tnfa</i>      | Tumour necrosis factor, a cytokine for systemic inflammation                                          | -                                           | ns                       | 0.2304          |
|                                                            | <i>Il1b</i>      | Interleukin 1 beta, a proinflammatory cytokine                                                        | ↑                                           | *                        | 0.0443          |
|                                                            | <i>Il18</i>      | Interleukin 18, a proinflammatory cytokine                                                            | -                                           | ns                       | 0.1732          |
|                                                            | <i>Cd68</i>      | Protein expressed by immune cells                                                                     | -                                           | ns                       | 0.5714          |
| Serotonin synthesis, transport, and metabolism             | <i>Tph1</i>      | Tryptophan hydroxylase 1, first-step enzyme in serotonin synthesis                                    | -                                           | ns                       | 0.5121          |
|                                                            | <i>Ddc</i>       | Aromatic amino acid decarboxylase, second-step enzyme in serotonin synthesis                          | -                                           | ns                       | 0.5296          |
|                                                            | <i>Slc6a4</i>    | Serotonin transporter                                                                                 | -                                           | ns                       | 0.0962          |
|                                                            | <i>Maoa</i>      | Monoamine oxidase A, enzyme for first step of serotonin metabolism                                    | -                                           | ns                       | 0.9137          |
|                                                            | <i>Aldh2</i>     | Aldehyde dehydrogenase, enzyme for second step of serotonin metabolism                                | -                                           | ns                       | 0.0934          |
| Active intestinal stem cell markers                        | <i>Lgr5</i>      | Leucine-rich G-protein-coupled receptor 5                                                             | ↓                                           | ***                      | 0.0007          |
|                                                            | <i>Olfm4</i>     | Olfactomedin 4                                                                                        | -                                           | ns                       | 0.2988          |
| Goblet cell marker                                         | <i>Muc2</i>      | Mucin 2                                                                                               | -                                           | ns                       | 0.2306          |
| Wnt signalling pathway (regulating stem cell self-renewal) | <i>Ctnnb1</i>    | β-catenin, a protein involved in Wnt signalling, a pathway important for intestinal stem cell renewal | -                                           | ns                       | 0.3537          |
|                                                            | <i>Lrp6</i>      | Low-density lipoprotein receptor-related protein 6, a receptor in Wnt signalling                      | -                                           | ns                       | 0.7782          |
|                                                            | <i>Fzd7</i>      | Frizzled-7, a receptor in Wnt signalling                                                              | -                                           | ns                       | 0.2633          |

|                                                            |               |                                                                                                                               |   |    |        |
|------------------------------------------------------------|---------------|-------------------------------------------------------------------------------------------------------------------------------|---|----|--------|
| Notch signalling<br>(modulating stem cell differentiation) | <i>Hes1</i>   | A transcription factor interacts with Notch signalling, modulating secretory lineage differentiation in intestinal epithelium | - | ns | 0.2309 |
| Cell proliferation                                         | <i>Mcc</i>    | Colorectal mutant cancer protein, a negative regulator of cell cycle progression                                              | ↓ | *  | 0.0171 |
|                                                            | <i>Pcna</i>   | Proliferating cell nuclear antigen                                                                                            | - | ns | 0.0587 |
|                                                            | <i>cMyc</i>   | A transcription factor regulating many pro-proliferation genes                                                                | - | ns | 0.6450 |
|                                                            | <i>Ccnd1</i>  | Cyclin D1, a protein required for progression through G1 phase of cell cycle                                                  | - | ns | 0.4143 |
|                                                            | <i>Cdkn1a</i> | Cyclin-dependent kinase (CDK) inhibitor 1, p21Cip1, inhibitor of cyclins/CDKs, including PCNA                                 | - | ns | 0.7205 |
| Glucose metabolism                                         | <i>Sirt1</i>  | Sirtuin 1, a regulator of hepatic gluconeogenesis, fatty acid oxidation and cholesterol degradation                           | - | ns | 0.7542 |
|                                                            | <i>Glut2</i>  | Glucose transporter 2                                                                                                         | - | ns | 0.5875 |
|                                                            | <i>Abcg5</i>  | Proteins for regulation of sterol absorption and excretion                                                                    | - | ns | 0.7158 |
|                                                            | <i>Abcg8</i>  |                                                                                                                               | - | ns | 0.1150 |
|                                                            | <i>Idh2</i>   | Isocitrate dehydrogenase [NADP], mitochondrial, a TCA cycle enzyme                                                            | ↓ | ** | 0.0046 |
| Lipid metabolism                                           | <i>Npc1l1</i> | A protein involved in cholesterol absorption                                                                                  | ↓ | *  | 0.0175 |
|                                                            | <i>Scarb1</i> | Scavenger receptor class B type 1, a receptor involved in cholesterol transport                                               | - | ns | 0.5271 |
|                                                            | <i>Fatp4</i>  | Long-chain fatty acid transport protein 4                                                                                     | - | ns | 0.9533 |
| Neural signalling                                          | <i>Npy</i>    | Neuropeptide Y, modulating diverse neurological processes including food intake and fat storage                               | - | ns | 0.2131 |
| K <sup>+</sup> channel                                     | <i>Kcnj12</i> | Potassium Inwardly Rectifying Channel Subfamily J Member 12                                                                   | ↓ | ** | 0.004  |

**Supplemental Table 5.** DNA Oligo Primer Sequences Used in qPCR.

| Gene Name        | Sequence (5'→3') |                         |
|------------------|------------------|-------------------------|
| <i>Abcg5</i>     | Forward          | AGGGCCTCACATCAACAGAG    |
|                  | Reverse          | GCTGACGCTGTAGGACACAT    |
| <i>Abcg8</i>     | Forward          | CTGTGGAATGGGACTGTACTTC  |
|                  | Reverse          | GTTGGACTGACCACTGTAGGT   |
| <i>Acaca</i>     | Forward          | ATGGGCGGAATGGTCTCTTTC   |
|                  | Reverse          | TGGGGACCTTGTCTTCATCAT   |
| <i>Acacb</i>     | Forward          | CCTTTGGCAACAAGCAAGGTA   |
|                  | Reverse          | AGTCGTACACATAGGTGGTCC   |
| <i>Acly</i>      | Forward          | CAGCCAAGGCAATTCAGAGC    |
|                  | Reverse          | CTCGACGTTTGATTAAGTGGTCT |
| <i>Aco2</i>      | Forward          | ATCGAGCGGGGAAAGACATAC   |
|                  | Reverse          | TGATGGTACAGCCACCTTAGG   |
| <i>Acs11</i>     | Forward          | TGCCAGAGCTGATTGACATTC   |
|                  | Reverse          | GGCATACCAGAAGGTGGTGAG   |
| <i>Actb</i>      | Forward          | GGCTGTATTCCCCTCCATCG    |
|                  | Reverse          | CCAGTTGGTAACAATGCCATGT  |
| <i>Adrb2</i>     | Forward          | GGGAACGACAGCGACTTCTT    |
|                  | Reverse          | GCCAGGACGATAACCGACAT    |
| <i>Adrb3</i>     | Forward          | CCTTGGGCGAAACTGGTTG     |
|                  | Reverse          | GTTGGTGACAGCTAGGTAGCG   |
| <i>Ahr</i>       | Forward          | GCCAGGACCAGTGTAGAGC     |
|                  | Reverse          | ATTCAGCGCCTGTAACAAGAA   |
| <i>Ahrr</i>      | Forward          | GACCCTCCTCAGGTGGTGTT    |
|                  | Reverse          | AATGAAGCAGCGTGTCAAGAA   |
| <i>Aldh2</i>     | Forward          | GACGCCGTCAGCAGGAAAA     |
|                  | Reverse          | CGCCAATCGGTACAACAGC     |
| <i>Alpi</i>      | Forward          | AGGATCCATCTGTCCTTTGG    |
|                  | Reverse          | ACGTTGTATGTCTTGGACAG    |
| <i>Atrogin-1</i> | Forward          | ATGCACACTGGTGCAGAGAG    |
|                  | Reverse          | TGTAAGCACACAGGCAGGTC    |

|                  |         |                         |
|------------------|---------|-------------------------|
| <i>Bmi1</i>      | Forward | CCAATGAAGACCGAGGAGAA    |
|                  | Reverse | TTTCCGATCCAATCTGCTCT    |
| <i>Ccnd1</i>     | Forward | GCGTACCCTGACACCAATCTC   |
|                  | Reverse | CTCCTCTTCGCACTTCTGCTC   |
| <i>Cd36</i>      | Forward | TTGTGGGGTTACAAAGATCCA   |
|                  | Reverse | AGGATAAAACACACCAACTGTGG |
| <i>Cd68</i>      | Forward | TGTCTGATCTTGCTAGGACCG   |
|                  | Reverse | AGGAGAGTAACGGCCTTTTTG   |
| <i>Cdkn1a</i>    | Forward | CCTGGTGATGTCCGACCTG     |
|                  | Reverse | CCATGAGCGCATCGCAATC     |
| <i>Chga</i>      | Forward | CACGGGAGACAGTGAGAGAG    |
|                  | Reverse | TCCGACTGACCATCATCTTTCT  |
| <i>Claudin-1</i> | Forward | TGGGTTTCATCCTGGCTTCT    |
|                  | Reverse | TGTATCTGCCCCGGTGCTTT    |
| <i>cMyc</i>      | Forward | CCCTATTTTCATCTGCGACGAG  |
|                  | Reverse | GAGAAGGACGTAGCGACCG     |
| <i>Cpt1a</i>     | Forward | CGCACATTACAAGGACATGG    |
|                  | Reverse | GAAGAGCCGAGTCATGGAAG    |
| <i>Cs</i>        | Forward | GGACAATTTTCCAACCAATCTGC |
|                  | Reverse | TCGGTTCATTCCCTCTGCATA   |
| <i>Ctnnb1</i>    | Forward | ATGGAGCCGGACAGAAAAGC    |
|                  | Reverse | CTTGCCACTCAGGGAAGGA     |
| <i>Cyplal</i>    | Forward | CAATGAGTTTGGGGAGGTTACTG |
|                  | Reverse | CCCTTCTCAAATGTCCTGTAGTG |
| <i>Cyplal2</i>   | Forward | AGTACATCTCCTTAGCCCCAG   |
|                  | Reverse | GGTCCGGGTGGATTCTTCAG    |
| <i>Cyp11b1</i>   | Forward | CACCAGCCTTAGTGCAGACAG   |
|                  | Reverse | GAGGACCACGGTTTCCGTTG    |
| <i>Ddc</i>       | Forward | AGCTGGTTGCTTACACATCTG   |
|                  | Reverse | CGAAGGGACTGCTTTTAGCTT   |
| <i>Fasn</i>      | Forward | TGGTGAATTGTCTCCGAAAAGA  |
|                  | Reverse | CACGTTCATCACGAGGTCATG   |

|               |         |                         |
|---------------|---------|-------------------------|
| <i>Fatp1</i>  | Forward | CGCTTTCTGCGTATCGTCTG    |
|               | Reverse | GATGCACGGGATCGTGTCT     |
| <i>Fatp4</i>  | Forward | CTGTTTGCTTCAATGGTACAGC  |
|               | Reverse | CGGAAGGTCCAGTGAGTGTC    |
| <i>Fiaf</i>   | Forward | CAATGCCAAATTGCTCCAATT   |
|               | Reverse | TGGCCGTGGGCTCAGT        |
| <i>Fzd7</i>   | Forward | AGACCCACCTTTCACTGCG     |
|               | Reverse | AAGTACATGAGGCCGTTAGCA   |
| <i>Glut2</i>  | Forward | TCAGAAGACAAGATCACCGGA   |
|               | Reverse | GCTGGTGTGACTGTAAGTGGG   |
| <i>Glut4</i>  | Forward | GTGACTGGAACACTGGTCCTA   |
|               | Reverse | CCAGCCACGTTGCATTGTAG    |
| <i>Gyk</i>    | Forward | GTCAGCAACCAGAGGGAAACC   |
|               | Reverse | CCACGGCATTATAGAGAGGCT   |
| <i>Hes1</i>   | Forward | GATAGCTCCCGGCATTCCAAG   |
|               | Reverse | GCGCGGTATTTCCCCAACA     |
| <i>Hmgcs1</i> | Forward | AAATGCCAGACCTACAGGTGG   |
|               | Reverse | ATGCTGCATGTGTGTCCCA     |
| <i>Hmgcr</i>  | Forward | AGCTTGCCCGAATTGTATGTG   |
|               | Reverse | TCTGTTGTGAACCATGTGACTTC |
| <i>Hnf4a</i>  | Forward | GGTTTAGCCGACAATGTGTGG   |
|               | Reverse | TCCCGCTCATTTTGGACAGC    |
| <i>Idh2</i>   | Forward | GGAGAAGCCGGTAGTGGAGAT   |
|               | Reverse | GGTCTGGTCACGGTTTGGAA    |
| <i>Il1b</i>   | Forward | GAAATGCCACCTTTTGACAGTG  |
|               | Reverse | TGGATGCTCTCATCAGGACAG   |
| <i>Il6</i>    | Forward | CTGCAAGAGACTTCCATCCAG   |
|               | Reverse | AGTGGTATAGACAGGTCTGTTGG |
| <i>Il18</i>   | Forward | GACTCTTGCGTCAACTTCAAGG  |
|               | Reverse | CAGGCTGTCTTTTGTCAACGA   |
| <i>Ki67</i>   | Forward | ATCATTGACCGCTCCTTTAGGT  |
|               | Reverse | GCTCGCCTTGATGGTTCCT     |



|                |         |                                                         |
|----------------|---------|---------------------------------------------------------|
| <i>Kcnj12</i>  |         | PrimePCR SYBR Green Assay – Bio-Rad. Catalog # 10029101 |
| <i>Lgr4</i>    | Forward | GCAGTCTCTACGCTTAGATGC                                   |
|                | Reverse | CACTTCCGTCAAGATGTTGTCA                                  |
| <i>Lgr5</i>    | Forward | ACATTCCCAAGGGAGCGTTC                                    |
|                | Reverse | ATGTGGTTGGCATCTAGGCG                                    |
| <i>Lipe</i>    | Forward | CCAGCCTGAGGGCTTACTG                                     |
|                | Reverse | CTCCATTGACTGTGACATCTCG                                  |
| <i>Lpl</i>     | Forward | TTGCCCTAAGGACCCCTGAA                                    |
|                | Reverse | TTGAAGTGGCAGTTAGACACAG                                  |
| <i>Lrp6</i>    | Forward | TTGTTGCTTTATGCAAACAGACG                                 |
|                | Reverse | GTTCGTTTAATGGCTTCTTCGC                                  |
| <i>Lyz</i>     | Forward | GTCACACTTCCTCGCTTTC                                     |
|                | Reverse | TGGCTTTGCTGACTGACAAG                                    |
| <i>Maoa</i>    | Forward | GCCCAGTATCACAGGCCAC                                     |
|                | Reverse | CGGGCTTCCAGAACCAAGA                                     |
| <i>Mcc</i>     | Forward | CGACGTTGACAGGCACATAGA                                   |
|                | Reverse | GCCAGGTTGGGATACAGATCG                                   |
| <i>Muc2</i>    | Forward | CCGACTTCAACCCAAGTGAT                                    |
|                | Reverse | GAGCAAGGGACTCTGGTCTG                                    |
| <i>Murf-1</i>  | Forward | AGAAGTCGGGGGTCAGGGGACG                                  |
|                | Reverse | GGTCCATGATCACTTCATGGCGGCACGAGG                          |
| <i>Myhc-1</i>  | Forward | CCAAGGGCCTGAATGAGGAG                                    |
|                | Reverse | GCAAAGGCTCCAGGTCTGAG                                    |
| <i>Myhc-2a</i> | Forward | AAGCGAAGAGTAAGGCTGTC                                    |
|                | Reverse | GTGATTGCTTGCAAAGGAAC                                    |
| <i>Myhc-2b</i> | Forward | ACAAGCTGCGGGTGAAGAGC                                    |
|                | Reverse | CAGGACAGTGACAAAGAACG                                    |
| <i>Myhc-2d</i> | Forward | CCAAGTGCAGGAAAGTGACC                                    |
|                | Reverse | AGGAAGAGACTGACGAGCTC                                    |
| <i>Myod</i>    | Forward | TACAGTGGCGACTCAGATGC                                    |
|                | Reverse | GAGATGCGCTCCACTATGCT                                    |
| <i>Npc11l</i>  | Forward | CGCCCTTCTTTCTACATGGGT                                   |

|                 |         |                          |
|-----------------|---------|--------------------------|
|                 | Reverse | GAATCTGCGCTTACGAGGGAG    |
| <i>Npy</i>      | Forward | TACTCCGCTCTGCGACACTA     |
|                 | Reverse | TCTTCAAGCCTTGTTCTGGG     |
| <i>Occludin</i> | Forward | GCAGCCTTCTGCTTCATCG      |
|                 | Reverse | CGTCGGGTTCACCTCCATTA     |
| <i>Olfm4</i>    | Forward | CAGCCACTTTCCAATTTCACTG   |
|                 | Reverse | GCTGGACATACTCCTTCACCTTA  |
| <i>Pc</i>       | Forward | CAGTGGCTGTCTACTCGGAG     |
|                 | Reverse | CCGCATCTACACCATTTTCCT    |
| <i>Pck1</i>     | Forward | TGACAGACTCGCCCTATGTG     |
|                 | Reverse | CCCAGTTGTTGACCAAAGGC     |
| <i>Pck2</i>     | Forward | ATGGCTGCTATGTACCTCCC     |
|                 | Reverse | GCGCCACAAAGTCTCGAAC      |
| <i>Pcna</i>     | Forward | ACCTCACCAGCATGTCCAA      |
|                 | Reverse | TCTTGATTGGTGCTTCGAATA    |
| <i>Pdk4</i>     | Forward | CCGCTTAGTGAACACTCCTTC    |
|                 | Reverse | TGACCAGCGTGTCTACAAACT    |
| <i>Pgcl1a</i>   | Forward | AAGGGTCCCCATTTGAGA       |
|                 | Reverse | AGGGTTATCTTGGTTGGCTTT    |
| <i>Pnpla2</i>   | Forward | TCCGTGGCTGTCTACTAAAGA    |
|                 | Reverse | TGGGATATGATGACGTTCTCTCC  |
| <i>Pnpla3</i>   | Forward | AGGTCATTTCTGGCAAGGTTC    |
|                 | Reverse | TCCACGACTTCGTCTTTGGAA    |
| <i>Ppara</i>    | Forward | AACATCGAGTGTCTGAATATGTGG |
|                 | Reverse | CCGAATAGTTCGCCGAAAGAA    |
| <i>Pparg</i>    | Forward | TCGCTGATGCACTGCCTATG     |
|                 | Reverse | GAGAGGTCCACAGAGCTGATT    |
| <i>Rapsyn</i>   | Forward | GGCAGGACCAGACAAAGCAA     |
|                 | Reverse | CGAGTGAGCTGTTACCAAGCA    |
| <i>Scarb1</i>   | Forward | TGTACTGCCTAACATCTTGGTCC  |
|                 | Reverse | ACTGTGCGGTTCATAAAAGCA    |
| <i>Scd1</i>     | Forward | TTCTTGCGATACACTCTGGTGC   |

|                |         |                          |
|----------------|---------|--------------------------|
|                | Reverse | CGGGATTGAATGTTCTTGTCGT   |
| <i>Scd2</i>    | Forward | GATCTCTGGCGCTTACTCAGC    |
|                | Reverse | CTCCCCAGTGGTGAGAACTC     |
| <i>Sdh</i>     | Forward | GAAAGGCGGGCAGGCTCATC     |
|                | Reverse | CACCACGGCACTCCCCATTTT    |
| <i>Sirt1</i>   | Forward | GCTGACGACTTCGACGACG      |
|                | Reverse | TCGGTCAACAGGAGGTTGTCT    |
| <i>Slc2a4</i>  | Forward | GGACCGGATTCCATCCCAC      |
|                | Reverse | TCCCAACCATTGAGAAATGATGC  |
| <i>Slc6a4</i>  | Forward | GTCATTGGCTATGCCGTGGA     |
|                | Reverse | CACCCATTTTCGGTGGTACTG    |
| <i>Slc25a1</i> | Forward | GAGGCATCGAAATCTGCATCA    |
|                | Reverse | GGATGGAGCCGTAGAGCAA      |
| <i>Srebp2</i>  | Forward | CCAAAGAAGGAGAGAGGCGG     |
|                | Reverse | CGCCAGACTTGTGCATCTTG     |
| <i>Tfam</i>    | Forward | GCTCTACACGCCCCTGGTTTCTGG |
|                | Reverse | TCGCTGTAGTGCCTGCTGCTCCTG |
| <i>Tnfa</i>    | Forward | GTCCCCAAAGGGATGAGAAGT    |
|                | Reverse | TTTGCTACGACGTGGGCTAC     |
| <i>Tph1</i>    | Forward | AACAAAGACCATTCCCTCCGAAAG |
|                | Reverse | TGTAACAGGCTCACATGATTCTC  |
| <i>Ucp1</i>    | Forward | AGGCTTCCAGTACCATTAGGT    |
|                | Reverse | CTGAGTGAGGCAAAGCTGATTT   |
| <i>Ucp2</i>    | Forward | ATGGTTGGTTTCAAGGCCACA    |
|                | Reverse | CGGTATCCAGAGGGAAAGTGAT   |
| <i>Vil1</i>    | Forward | GGCAACGAGAGCGAGACTTT     |
|                | Reverse | GGAGTTTGTCTTCTACGTGCTTCA |
| <i>Zo-1</i>    | Forward | TCACGATCTCCTGACCAACG     |
|                | Reverse | GGCTGACGGGTAAATCCACA     |
|                |         |                          |
